# Supplementary material for: Microfluidic Isolation of Circulating Tumor Cells and Cancer Stem-Like Cells from Patients with Pancreatic Ductal Adenocarcinoma
Source: PubMed Central journal article supplement — Theranostics. 2019 Feb 20;9(5):1417–25. doi: 10.7150/thno.28745 (PMC6401494; doi:10.7150/thno.28745), 2019-02-20
Supplement: thnov09p1417s1.pdf [file thnov09p1417s1.pdf]

# Supporting Information for

## Microfluidic Isolation of Circulating Tumor Cells and Cancer Stem-like Cells from Patients with Pancreatic Ductal Adenocarcinoma

Jose I. Varillas <sup>1,2,†</sup>, Jinling Zhang <sup>2,†</sup>, Kangfu Chen <sup>2</sup>, Isis I. Barnes <sup>3</sup>, Chen Liu <sup>4</sup>, Thomas J. George <sup>3\*</sup>,  
and Z. Hugh Fan <sup>1,2,5\*</sup>

<sup>1</sup>J. Crayton Pruitt Family Department of Biomedical Engineering,  
University of Florida, P.O. Box 116131, Gainesville, FL 32611, USA.

<sup>2</sup>Interdisciplinary Microsystems Group, Department of Mechanical and Aerospace Engineering,  
University of Florida, PO Box 116250, Gainesville, Florida 32611, USA.

<sup>3</sup>Department of Medicine, University of Florida, P.O. Box 100278, Gainesville, FL 32611, USA.

<sup>4</sup>Department of Pathology, Immunology and Laboratory Medicine, University of Florida, P.O. Box  
100275, Gainesville, FL, 32610, USA.

<sup>5</sup>Department of Chemistry, University of Florida, P.O. Box 117200, Gainesville, FL 32611, USA.

† These authors contributed equally to this work.

\* Authors to whom the correspondences should be addressed: Z. Hugh Fan ([hfan@ufl.edu](mailto:hfan@ufl.edu)) and Thomas J. George ([thom.george@medicine.ufl.edu](mailto:thom.george@medicine.ufl.edu)).

**Table S1. Patient demographics and clinicopathological characteristics.**

| Demographic                         | All Patients (N=24) |          |
|-------------------------------------|---------------------|----------|
|                                     | No.                 | %        |
| <b>Age (years)</b>                  |                     |          |
| Mean                                | 64.8                |          |
| Standard deviation                  | 10.4                |          |
| Min – Max                           | 42 – 82             |          |
| <b>Gender</b>                       |                     |          |
| Male                                | 17                  | 70.8     |
| Female                              | 7                   | 29.2     |
| <b>Race</b>                         |                     |          |
| White                               | 23                  | 95.8     |
| Asian                               | 1                   | 4.2      |
| <b>Ethnicity</b>                    |                     |          |
| Non-Hispanic                        | 23                  | 95.8     |
| Hispanic                            | 1                   | 4.2      |
| <b>Tumor Location in Pancreas</b>   |                     |          |
| Head                                | 9                   | 37.5     |
| Body                                | 6                   | 25.0     |
| Tail                                | 4                   | 16.7     |
| Body/Head                           | 2                   | 8.3      |
| Body/Tail                           | 1                   | 4.2      |
| Unspecified                         | 2                   | 8.3      |
| <b>Baseline Serum CA19-9 Levels</b> |                     |          |
| Mean                                | 2894.1              |          |
| Standard deviation                  | 4220.8              |          |
| Sample size                         | 78                  |          |
| <b>Enumeration</b>                  |                     |          |
| Sample size                         | 77                  | 72       |
| Mean (per mL)                       | 3.87                | 2.02     |
| Standard deviation (per mL)         | 2.43                | 1.73     |
| Min – Max (per mL)                  | 0 – 9.25            | 0 – 9.25 |

**Table S2. Fluorescent filter cube setup** (from Chroma Technology Corporation).

| <b>Filter cubes</b>       | <b>DAPI</b> | <b>FITC</b> | <b>CY3</b> | <b>CY5</b> |
|---------------------------|-------------|-------------|------------|------------|
| <b>Excitation (EX)</b>    | AT350/50x   | HQ480/40x   | ET545/25x  | ET620/60x  |
| <b>Beam splitter (BS)</b> | T400lp      | T510lpxrxt  | T565lpxr   | T660lpxr   |
| <b>Emission (EM)</b>      | ET460/50m   | ET525/30m   | ET605/70m  | ET700/75m  |
| <b>Set catalog #</b>      | 49000       | 49011*      | 49004      | 49006      |

\*Only the original excitation filter was used from this product catalog, the beam splitter and emission filter were replaced to create a custom FITC filter cube.

**Table S3. Number of EpCAM<sup>+</sup>CK<sup>+</sup>CD45<sup>-</sup>DAPI<sup>+</sup> cells and CD133<sup>+</sup>CK<sup>+</sup>CD45<sup>-</sup>DAPI<sup>+</sup> cells detected in healthy donor blood.** The healthy control counts are represented in Figure 2.

| <b>Capture Antibody Used</b> | <b>Healthy Donor Blood Sample</b> | <b>CK<sup>+</sup>CD45<sup>-</sup>DAPI<sup>+</sup> cells/mL</b> |
|------------------------------|-----------------------------------|----------------------------------------------------------------|
| Anti-EpCAM                   | 1                                 | 0                                                              |
|                              | 2                                 | 0                                                              |
|                              | 3                                 | 0                                                              |
|                              | 4                                 | 0                                                              |
|                              | 5                                 | 0                                                              |
|                              | 6                                 | 0                                                              |
|                              | 7                                 | 0                                                              |
|                              | 8                                 | 0                                                              |
|                              | 9                                 | 0                                                              |
|                              | 10                                | 0                                                              |
|                              | 11                                | 0.25                                                           |
|                              | 12                                | 0                                                              |
|                              | 13                                | 0                                                              |
|                              | 14                                | 0                                                              |
|                              | 15                                | 0.25                                                           |
|                              | 16                                | 0                                                              |
|                              | 17                                | 0                                                              |
|                              | 18                                | 0.75                                                           |
|                              | 19                                | 0                                                              |
| Anti-CD133                   | 1                                 | 0                                                              |
|                              | 2                                 | 0                                                              |
|                              | 3                                 | 0                                                              |
|                              | 4                                 | 0                                                              |
|                              | 5                                 | 0                                                              |

**Table S4. Quantification of CTCs in metastatic pancreatic cancer patients.** The patient CTC (N=61) and CSC (N=56) data represented in Figure 2 is shown in the table below.

| Patient ID | Treatment Cycle # | EpCAM <sup>+</sup> CK <sup>+</sup> CD45 <sup>-</sup> DAPI <sup>+</sup> cells/ mL | CD133 <sup>+</sup> CK <sup>+</sup> CD45 <sup>-</sup> DAPI <sup>+</sup> cells/mL |
|------------|-------------------|----------------------------------------------------------------------------------|---------------------------------------------------------------------------------|
| P-07       | 41                | 4                                                                                | 3                                                                               |
| P-07       | 62                | 1.5**                                                                            | 0**                                                                             |
| P-07       | 65                | 2.75                                                                             | 0.5                                                                             |
| P-07       | 78                | 2.25                                                                             | 0.75                                                                            |
| P-07       | 79                | 2                                                                                | 0                                                                               |
| P-15       | 32                | 1                                                                                | 2.5                                                                             |
| P-15       | 43                | 3.75                                                                             | 2.75                                                                            |
| P-15       | 44                | 4                                                                                | 2.25                                                                            |
| P-15       | 48                | 3                                                                                | 2                                                                               |
| P-15       | 63                | 1.5                                                                              | 1                                                                               |
| P-15       | 65                | 1.5                                                                              | 0.5                                                                             |
| P-15       | 73                | 1                                                                                | 0                                                                               |
| P-19       | 7                 | 6                                                                                | N/A                                                                             |
| P-19       | 8                 | 3                                                                                | N/A                                                                             |
| P-19       | 10                | 3.25                                                                             | 0.5                                                                             |
| P-19       | 12                | 5.25                                                                             | 0.75                                                                            |
| P-19       | 18                | 4.5                                                                              | N/A                                                                             |
| P-19       | 20                | 2.55                                                                             | N/A                                                                             |
| P-19       | 22                | 3.125                                                                            | N/A                                                                             |
| P-19       | 24                | 2.1875                                                                           | N/A                                                                             |
| P-19       | 26                | N/A                                                                              | 3                                                                               |
| P-24       | 10                | 8                                                                                | 2.5                                                                             |
| P-24       | 12                | 6.5                                                                              | 5                                                                               |
| P-29       | 1                 | 9.25                                                                             | 1.5                                                                             |
| P-30       | 1                 | 5.75                                                                             | 9.25                                                                            |
| P-30       | 3                 | 3                                                                                | 0                                                                               |
| P-30       | 13                | 4                                                                                | 2                                                                               |
| P-30       | 15                | 5.5                                                                              | 4.25                                                                            |
| P-30       | 16                | 4.75                                                                             | 4.5                                                                             |
| P-32       | 10                | 3.25                                                                             | 1.5                                                                             |
| P-32       | 12                | 2.5                                                                              | 1.25                                                                            |
| P-32       | 15                | 8.25                                                                             | 3                                                                               |
| P-32       | 22                | 5                                                                                | 2.75                                                                            |
| P-33       | 2                 | 6                                                                                | 4.5                                                                             |
| P-34       | 1                 | 7                                                                                | 3.75                                                                            |
| P-34       | 2                 | 3                                                                                | 3.5                                                                             |
| P-34       | 3                 | 3.25                                                                             | 2.5                                                                             |
| P-34       | 5                 | 2.5                                                                              | 4                                                                               |
| P-35       | 1                 | 8.25                                                                             | 3.5                                                                             |
| P-35       | 2                 | 3.5                                                                              | 3.25                                                                            |

|      |    |      |      |
|------|----|------|------|
| P-35 | 5  | 5    | 3    |
| P-35 | 6  | 6.5  | 3.75 |
| P-36 | 1  | 5.5  | 0.5  |
| P-36 | 2  | 0.75 | 0.75 |
| P-36 | 5  | 2    | 0    |
| P-36 | 11 | 1.25 | 0    |
| P-36 | 14 | 4.25 | 1    |
| P-37 | 1  | 7.5  | 2.25 |
| P-38 | 1  | 4.5  | 1.25 |
| P-38 | 2  | 3    | 1    |
| P-38 | 3  | 3.25 | 1.75 |
| P-38 | 4  | 4    | 3.5  |
| P-40 | 1  | 8.25 | 4.25 |
| P-40 | 2  | 9    | 2.75 |
| P-40 | 3  | 6.5  | 3    |
| P-41 | 1  | 6.25 | 5.5  |
| P-42 | 1  | 7.25 | 1.75 |
| P-42 | 2  | 8.5  | 1.5  |
| P-43 | 1  | 7    | 0.5  |
| P-43 | 2  | 4    | 0    |
| P-44 | 1  | 4.75 | 2    |
| P-44 | 2  | 2    | 1.5  |

**Note:** the asterisks (\*\*) marks the enumeration data point which was obtained using the RBC lysis method, due to technical issues encountered during PBMC isolation.

**Table S5. CTC/CSC subtype enumeration.** The patient CTC and CSC subtype enumeration data (N=16) from 11 of the 24 patients is shown in the table below. All the patients in the subtype analysis (denoted with a ‘C’ instead of a ‘P’) were given different identifiers to blind scientists about the source of the blood. Five of the eleven patients in the subtype analysis were also part of the main CTC and CSC quantification study.

| Patient ID  | EpCAM Capture                                                      |                                                       | CD133 Capture                                                      |                                                       | EpCAM & CD133 Capture                                        |
|-------------|--------------------------------------------------------------------|-------------------------------------------------------|--------------------------------------------------------------------|-------------------------------------------------------|--------------------------------------------------------------|
|             | CD133 <sup>+</sup> CK <sup>+</sup> CD45-DAPI <sup>+</sup> cells/mL | CD133-CK <sup>+</sup> CD45-DAPI <sup>+</sup> cells/mL | EpCAM <sup>+</sup> CK <sup>+</sup> CD45-DAPI <sup>+</sup> cells/mL | EpCAM-CK <sup>+</sup> CD45-DAPI <sup>+</sup> cells/mL | CK <sup>+</sup> CD45 <sup>-</sup> DAPI <sup>+</sup> cells/mL |
| C-16 (P-32) | 0                                                                  | 2                                                     | 1                                                                  | 3                                                     | N/A                                                          |
| C-23        | 1                                                                  | 3                                                     | 0                                                                  | 2                                                     | N/A                                                          |
| C-24        | 0                                                                  | 2                                                     | 1                                                                  | 1                                                     | N/A                                                          |
| C-27        | 0                                                                  | 0                                                     | 0                                                                  | 1                                                     | N/A                                                          |
| C-27        | 0                                                                  | 0                                                     | 0                                                                  | 0                                                     | 1                                                            |
| C-28        | 0                                                                  | 0                                                     | 2                                                                  | 0                                                     | 0                                                            |
| C-29        | 2                                                                  | 1                                                     | 0                                                                  | 0                                                     | 5                                                            |
| C-30 (P-15) | 1                                                                  | 2                                                     | 0                                                                  | 0                                                     | 0                                                            |
| C-30 (P-15) | 0                                                                  | 1                                                     | 0                                                                  | 0                                                     | N/A                                                          |
| C-30 (P-15) | 0                                                                  | 1                                                     | 0                                                                  | 0                                                     | N/A                                                          |

|             |   |   |   |   |     |
|-------------|---|---|---|---|-----|
| C-31 (P-35) | 0 | 2 | 0 | 0 | N/A |
| C-31 (P-35) | 0 | 4 | 0 | 4 | 0   |
| C-32        | 0 | 0 | 0 | 0 | 2   |
| C-33 (P-07) | 0 | 1 | 1 | 2 | 4   |
| C-33 (P-07) | 0 | 0 | 0 | 1 | N/A |
| C-38 (P-36) | 0 | 7 | 0 | 3 | N/A |

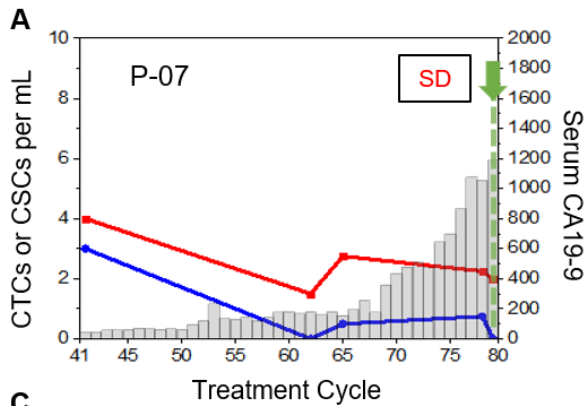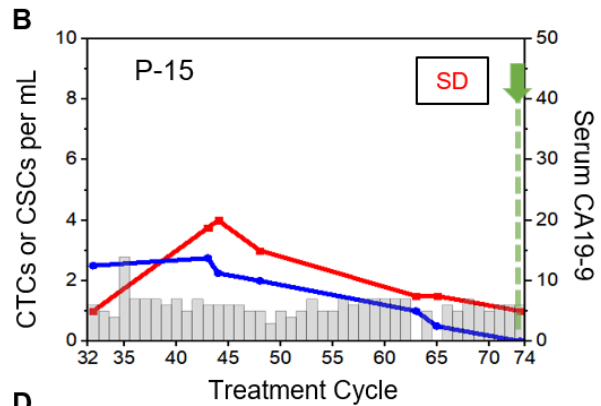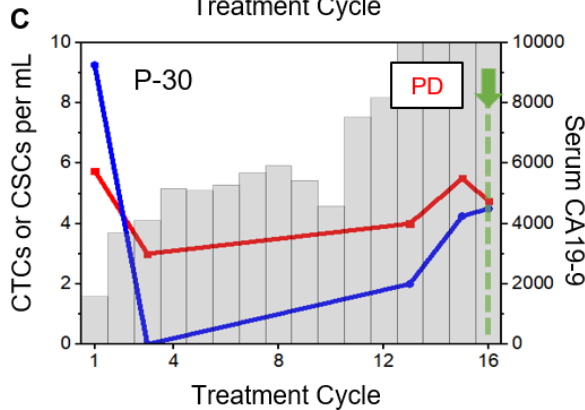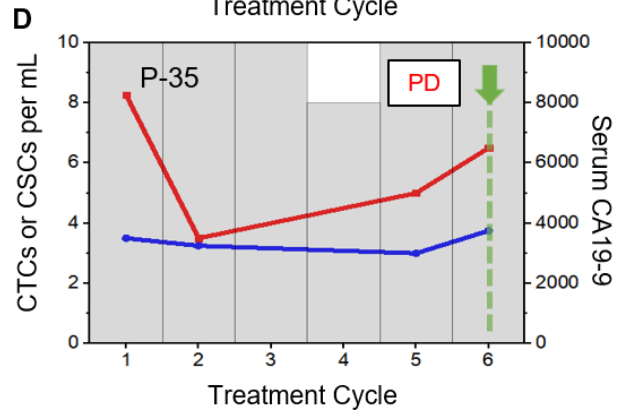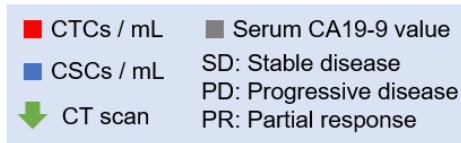

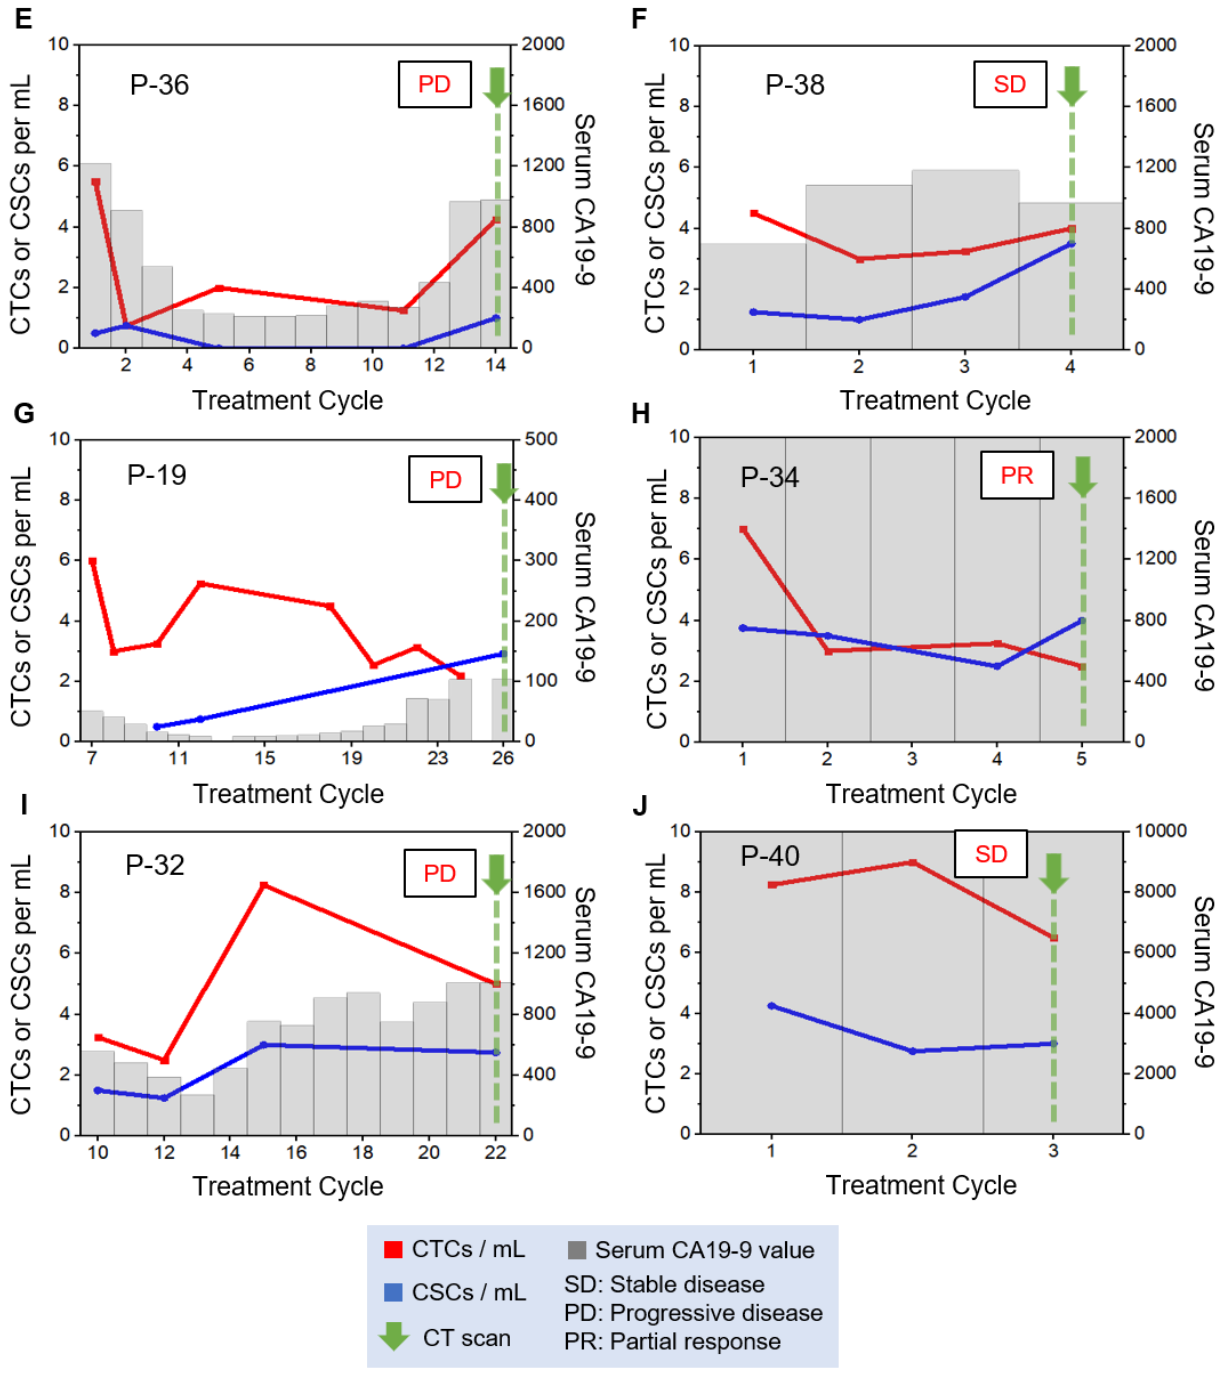

**Figure S1.** Longitudinal enumeration of CTCs and CSCs during treatment. Graphs A-J show the evolution of CTC and CSC numbers, as well as serum CA19-9 values, during the clinical course and treatment of a set of ten PDAC patients. Green arrows depict CT scans. Each treatment cycle is 2 weeks long.

**Table S6. Pearson correlation table.**

|                                |                                                       | <b>CTCs /<br/>mL</b> | <b>CSCs /<br/>mL</b> | <b>Serum<br/>CA19-9</b> | <b>Treatment<br/>cycle</b> |
|--------------------------------|-------------------------------------------------------|----------------------|----------------------|-------------------------|----------------------------|
| <b>CTCs per mL</b>             | Correlation coefficient<br>Significance level p-value |                      | 0.425<br>0.0008      | 0.320<br>0.0136         | -0.503<br><0.0001          |
| <b>CSCs per mL</b>             | Correlation coefficient<br>Significance level p-value | 0.425<br>0.0008      |                      | 0.434<br>0.0006         | -0.332<br>0.0103           |
| <b>Serum CA19-9<br/>levels</b> | Correlation coefficient<br>Significance level p-value | 0.320<br>0.0136      | 0.434<br>0.0006      |                         | -0.362<br>0.0048           |
| <b>Treatment<br/>cycle</b>     | Correlation coefficient<br>Significance level p-value | -0.503<br><0.0001    | -0.332<br>0.0103     | -0.362<br>0.0048        |                            |
